# Supplementary material
Source: publisher figshare collection journal article supplement (https://tandf.figshare.com/ndownloader/files/16766192)
Supplement: Supplementary file 1 [file 16766192]

Supporting Information

**Cascade catalytic nanoplatform for enhanced starvation and sonodynamic therapy**

Yingjie Zhang†, Huiling Wang‡, Xuedong Jia†, Shuzhang Du†, Yanyan Yin§,*, Xiaojian Zhang†,*

†Department of Pharmacy, The First Affiliated Hospital of Zhengzhou University, Zhengzhou 450052,China

§School of Pharmacy, Xinxiang Medical University, Xinxiang 453003, China

‡School of Pharmaceutical Sciences, Zhengzhou Railway Vocational and Technical College, Zhengzhou 451460, China

*Corresponding author.

Email: 105772801@qq.com (Y. Yin), zhangxiaojian20190@163.com (X. Zhang).

**
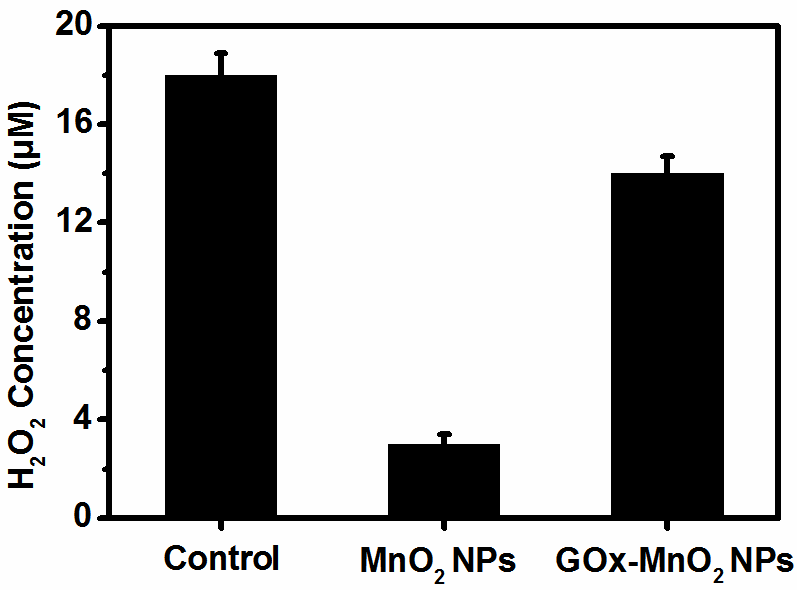
**

**Figure S1.** The H2O2 concentrations of MCF-7 cells with different treatments.


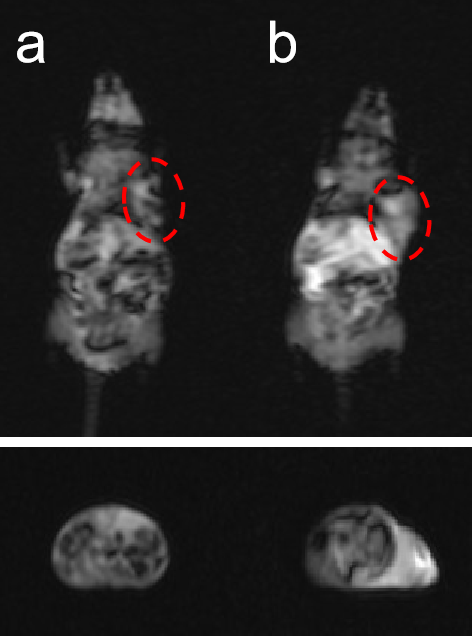


**Figure S2.** *In vivo* T1-weighted MRI images of tumor-bearing mice. (a) Control group; (b) 3 h post administration of GOx-MnO2/HMME.


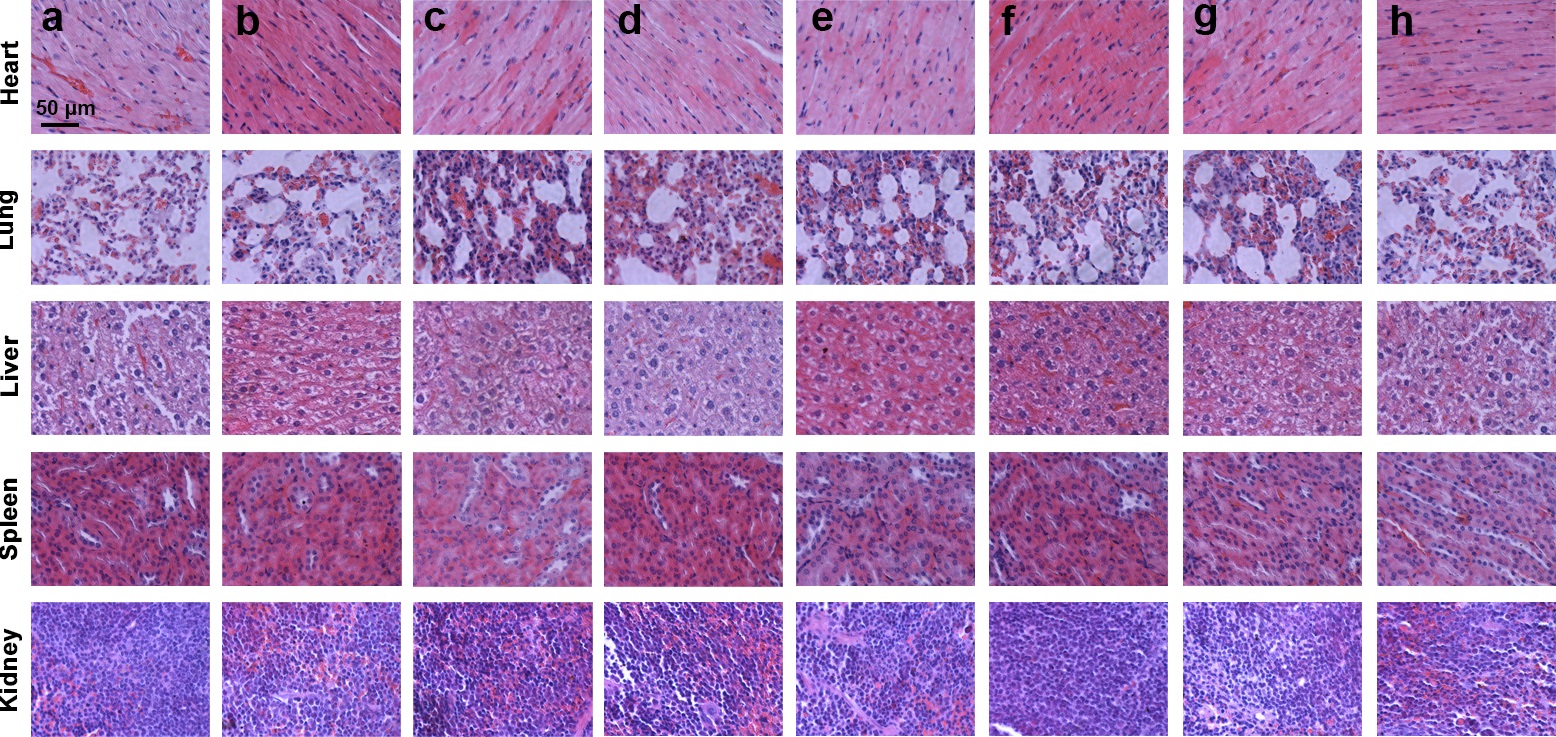


**Figure S3.** H&E stained tissues harvested from different groups of mice. Note: a) Control group; b) Control + US; c) HMME; d) HMME + US; e) GOx-MnO2; f) GOx-MnO2 + US; g) GOx-MnO2/HMME; h) GOx-MnO2/HMME + US.
